# Supplementary material for: Chondroitin Sulfate Proteoglycan 4 Provides New Treatment Approach to Preventing Peritoneal Dissemination in Ovarian Cancer
Source: MDPI journal article supplement (doi:10.3390/ijms25031626), 2024-01-28
Supplement: s1 [file s1]

**A**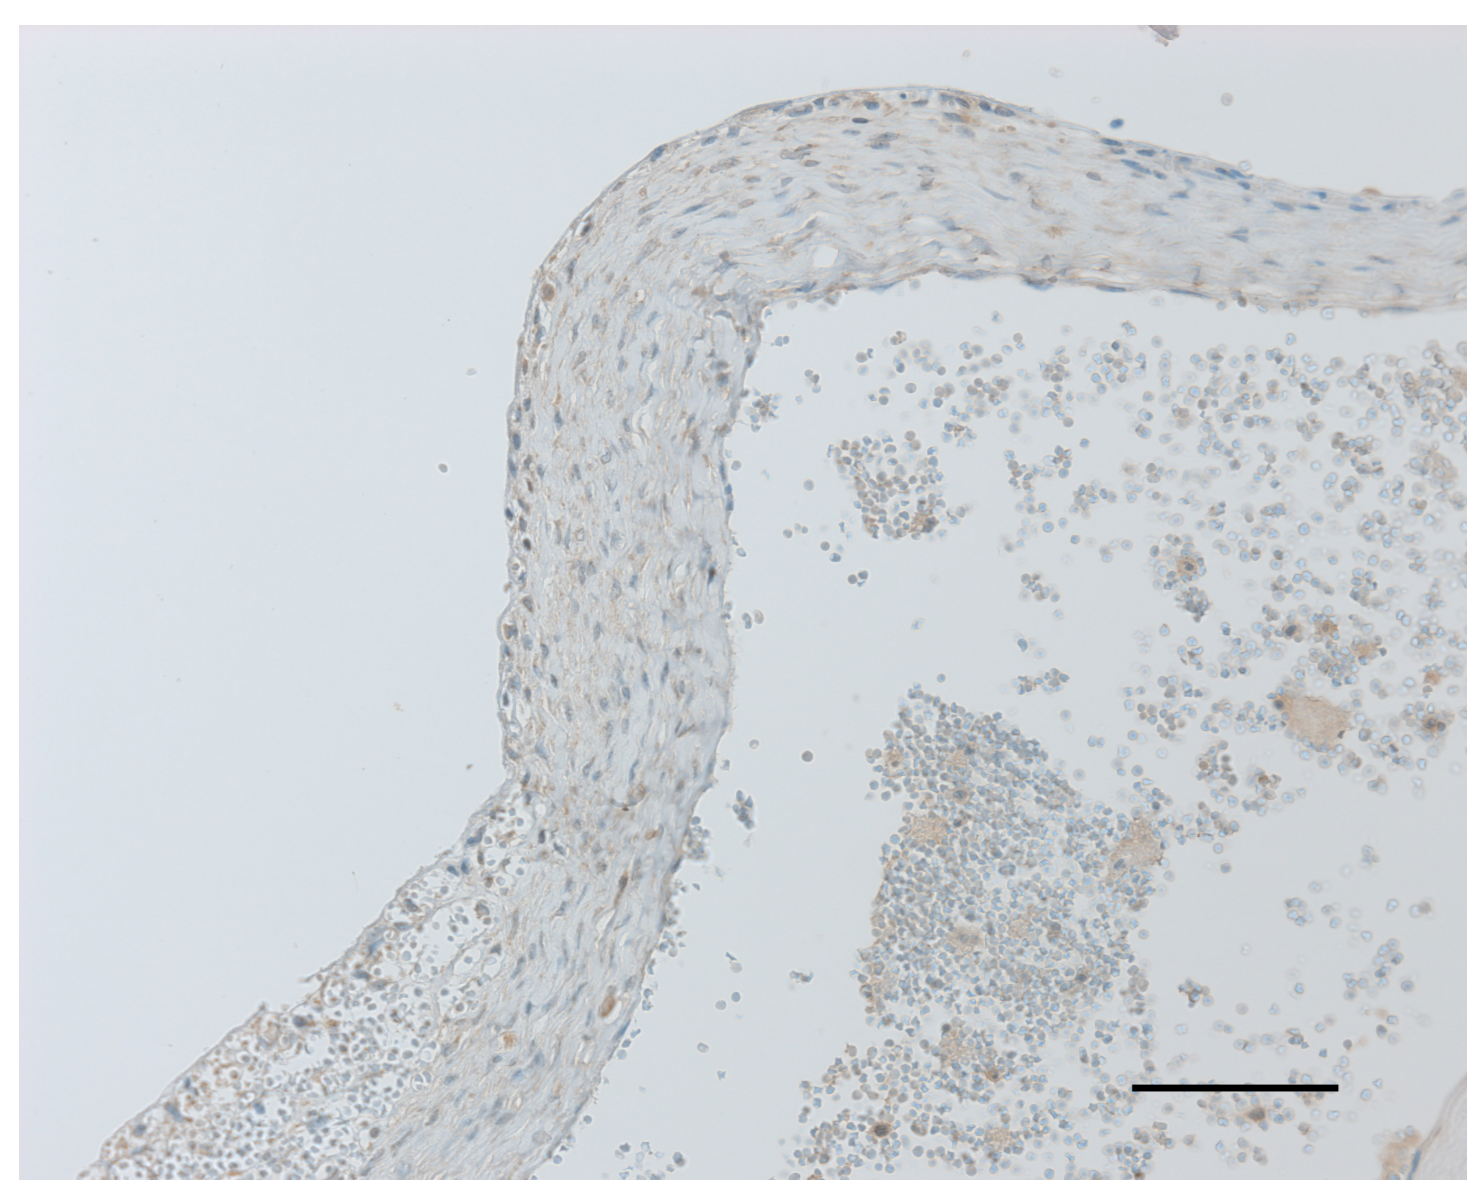

Normal ovarian epithelial

**B**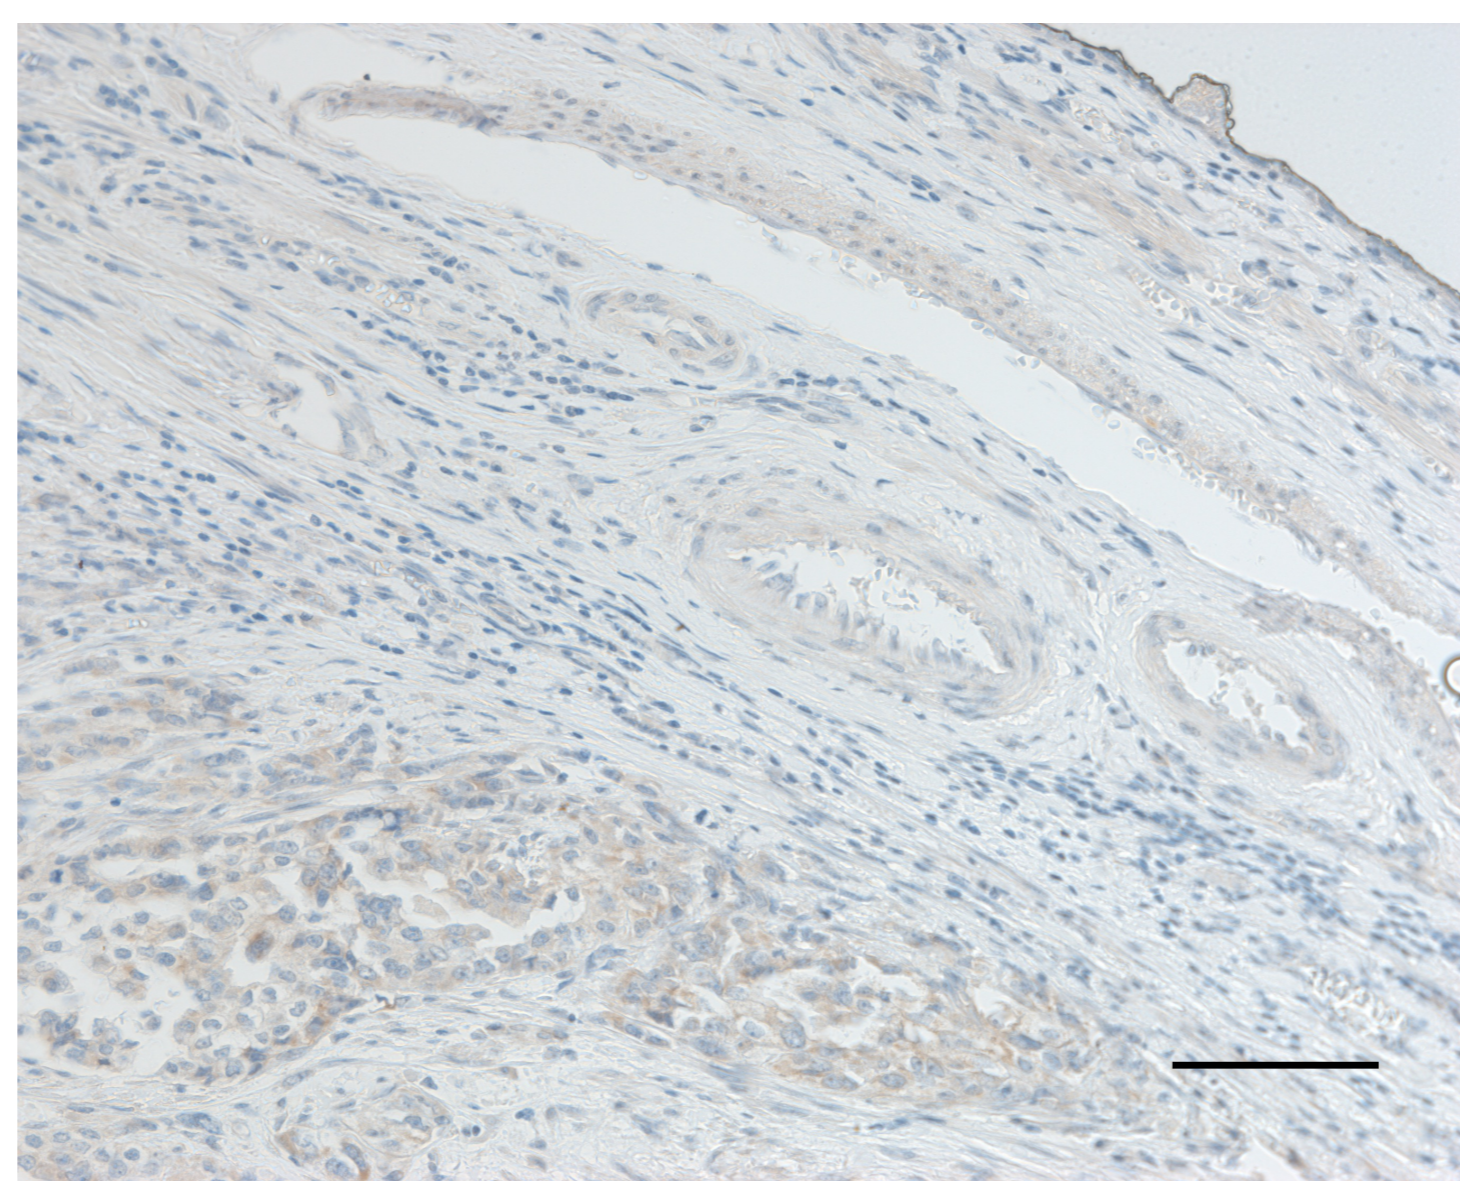

Tumor and stroma

**C**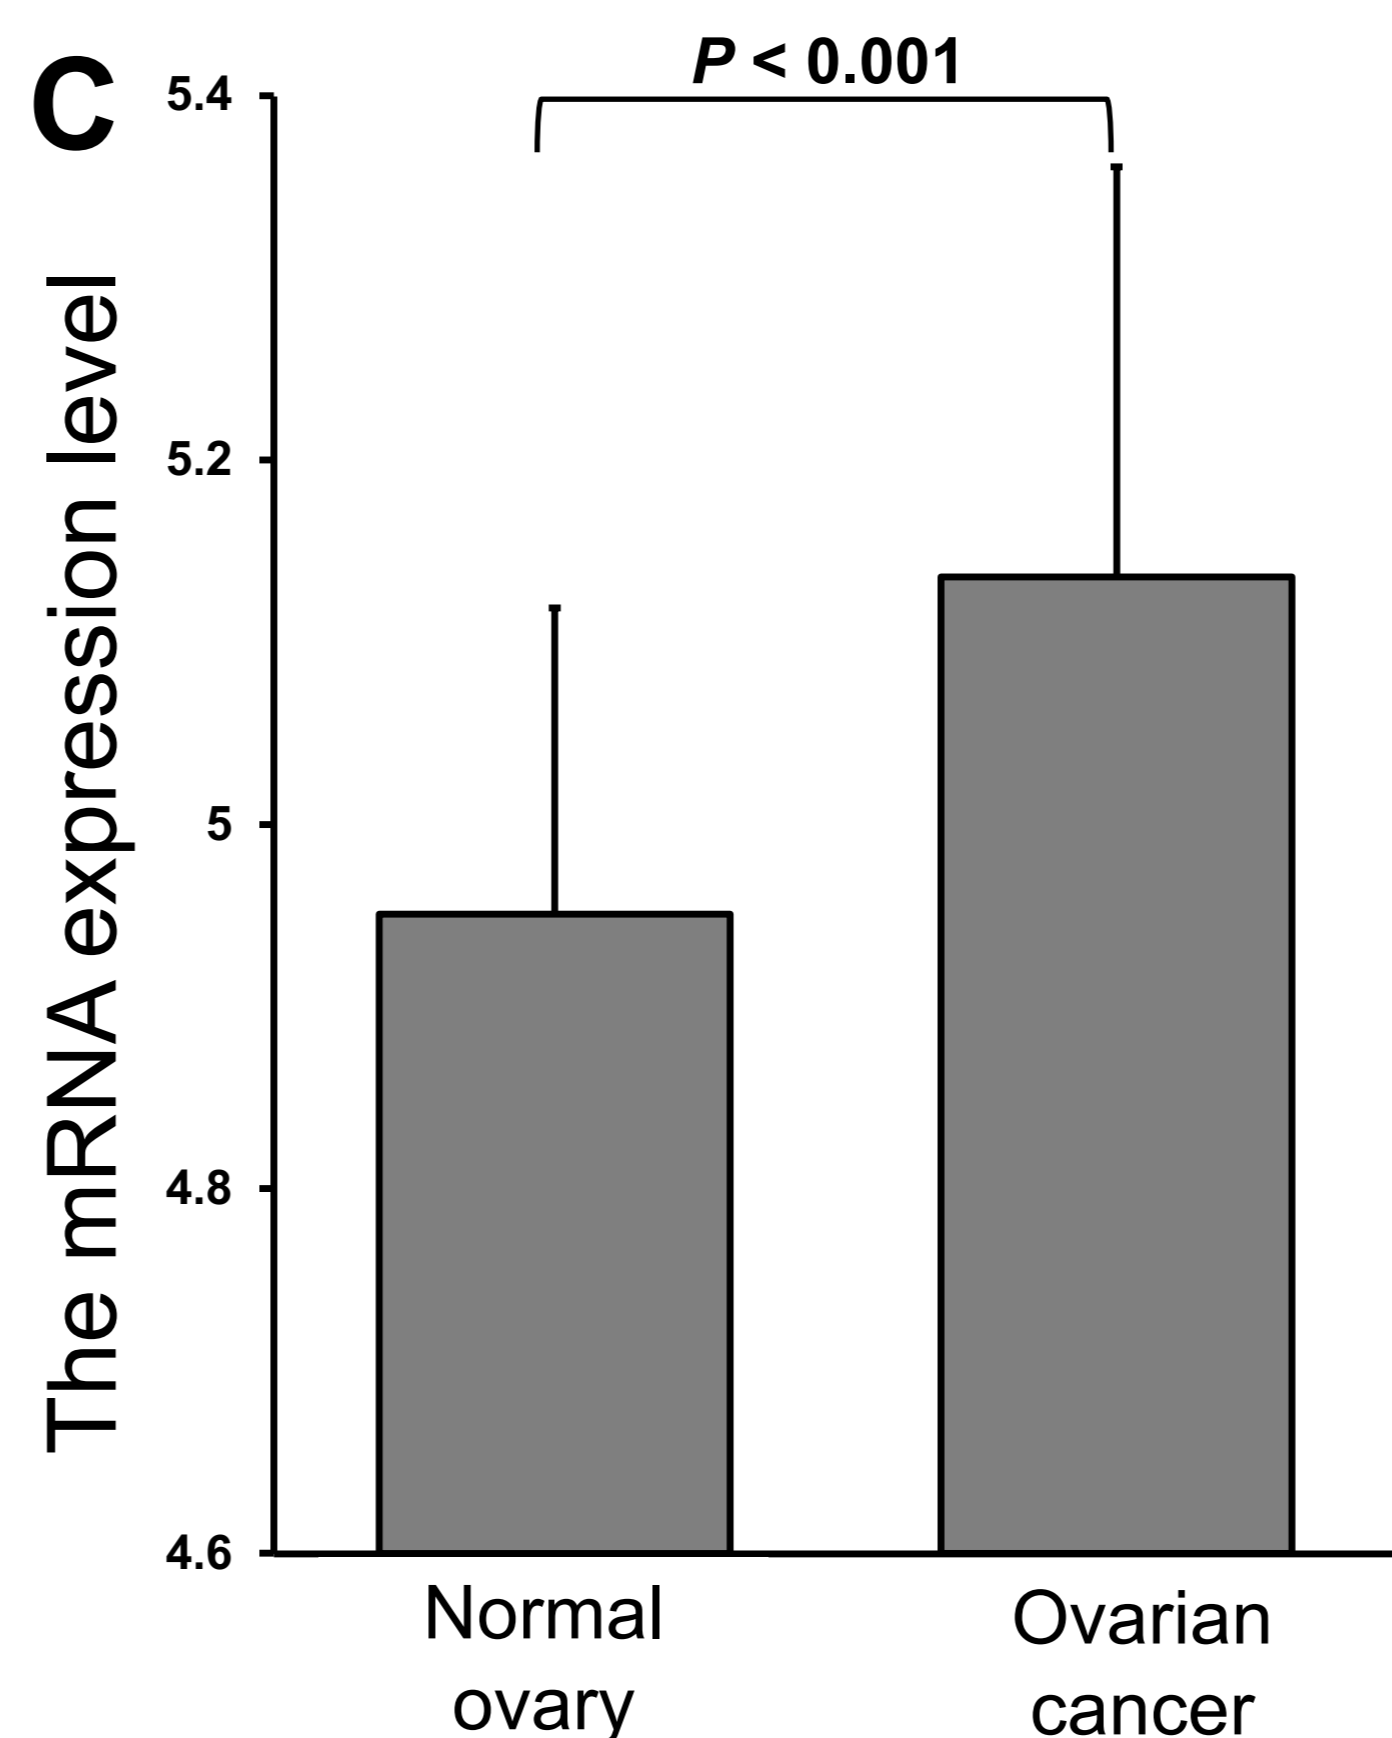**D**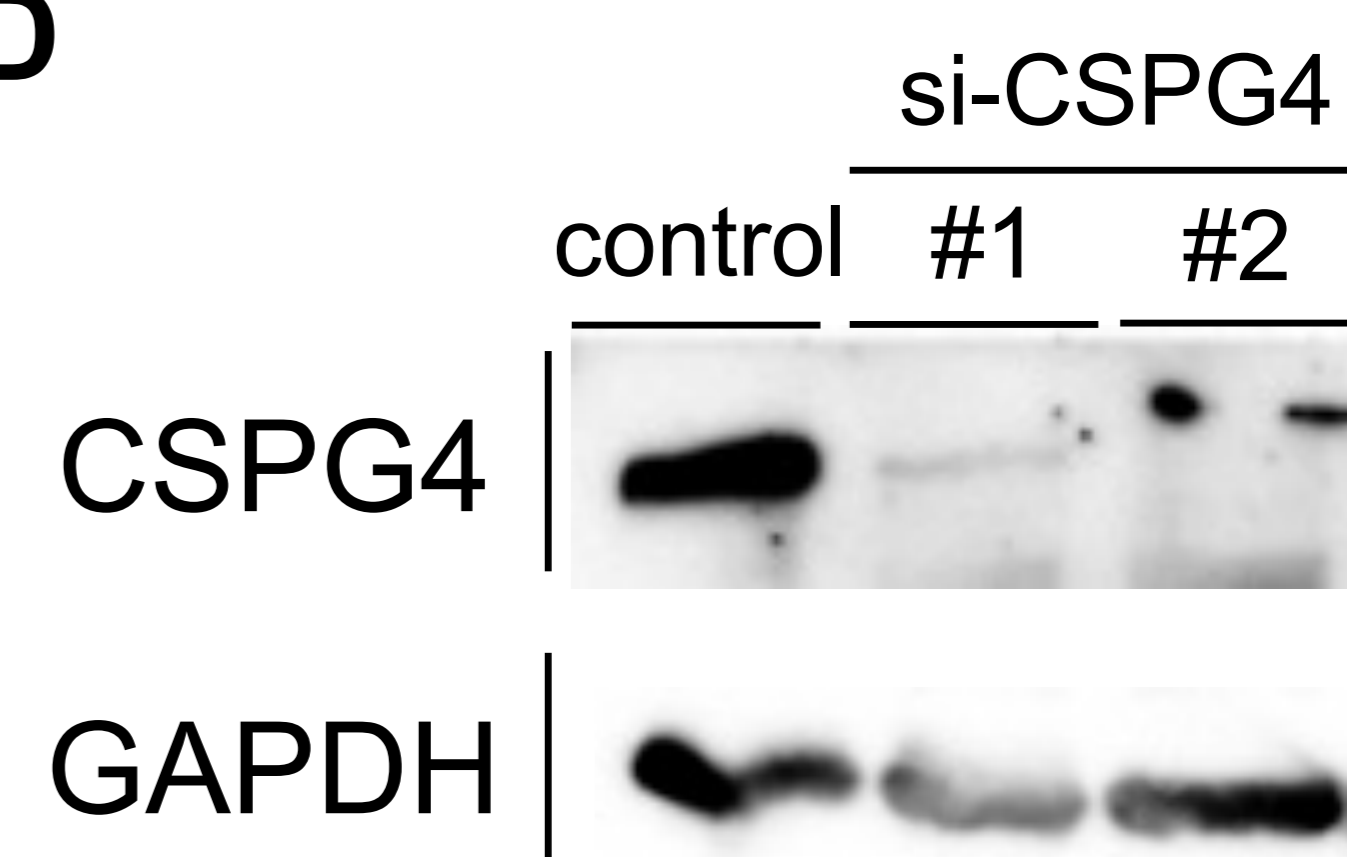**E**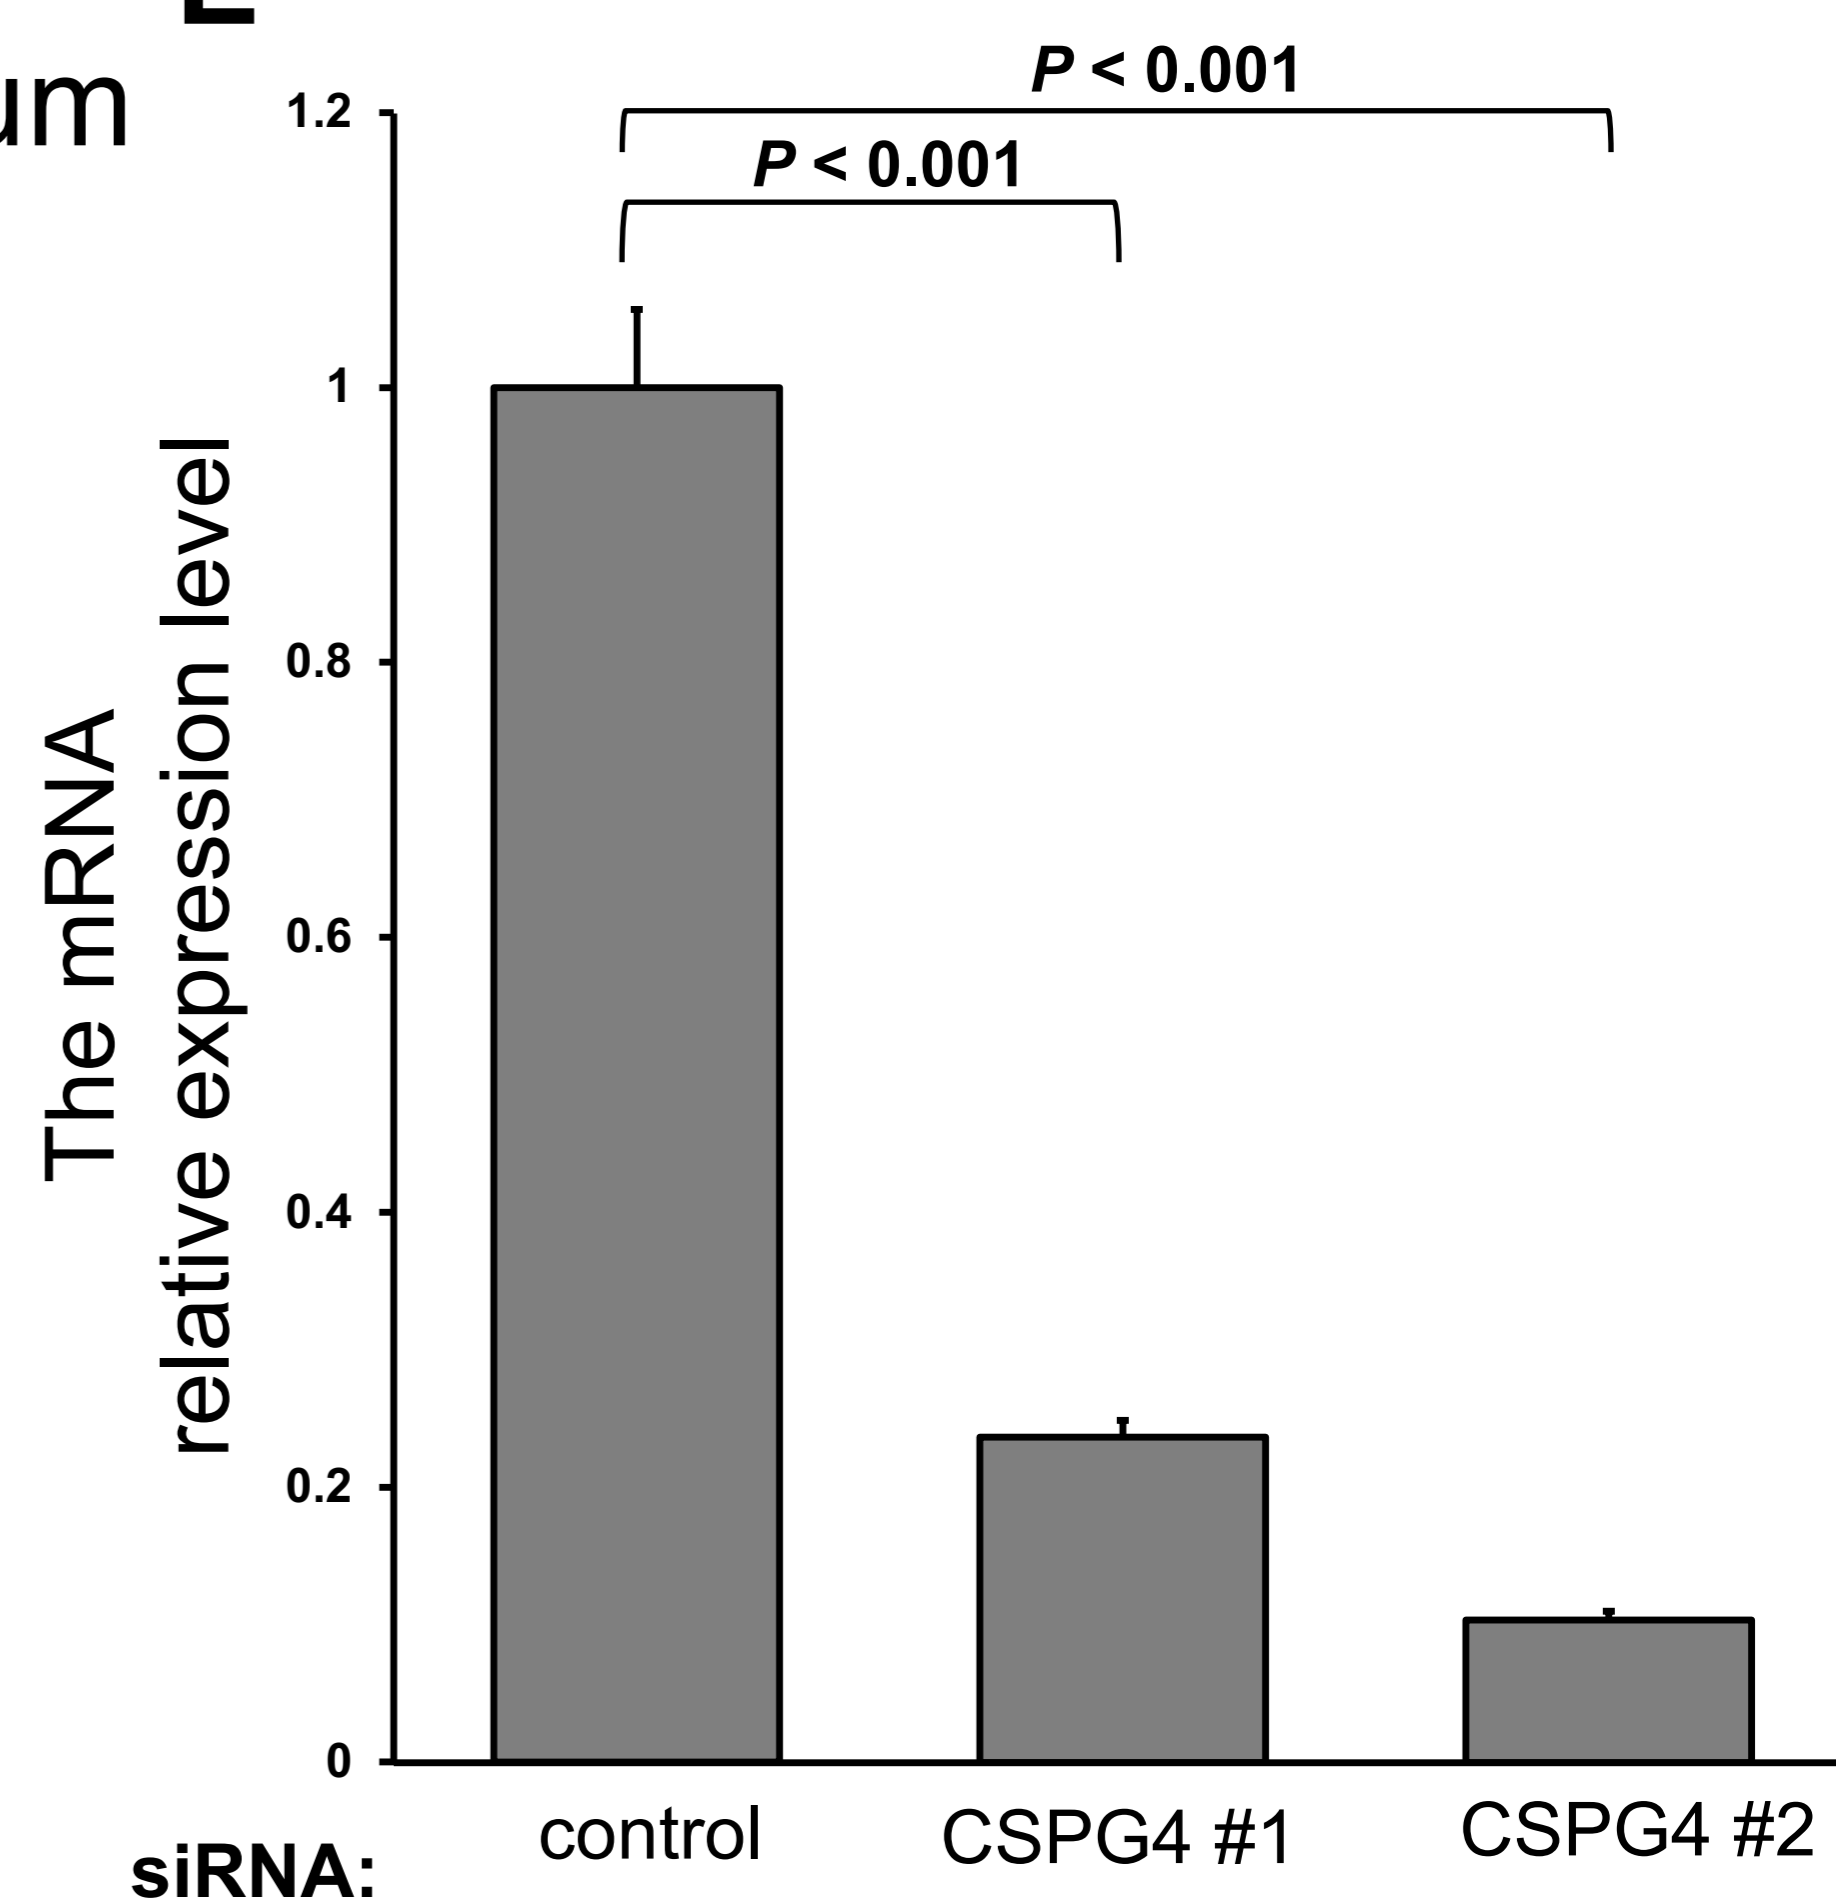**F****ES2****NOE****Migration****Invasion****Migration****Invasion**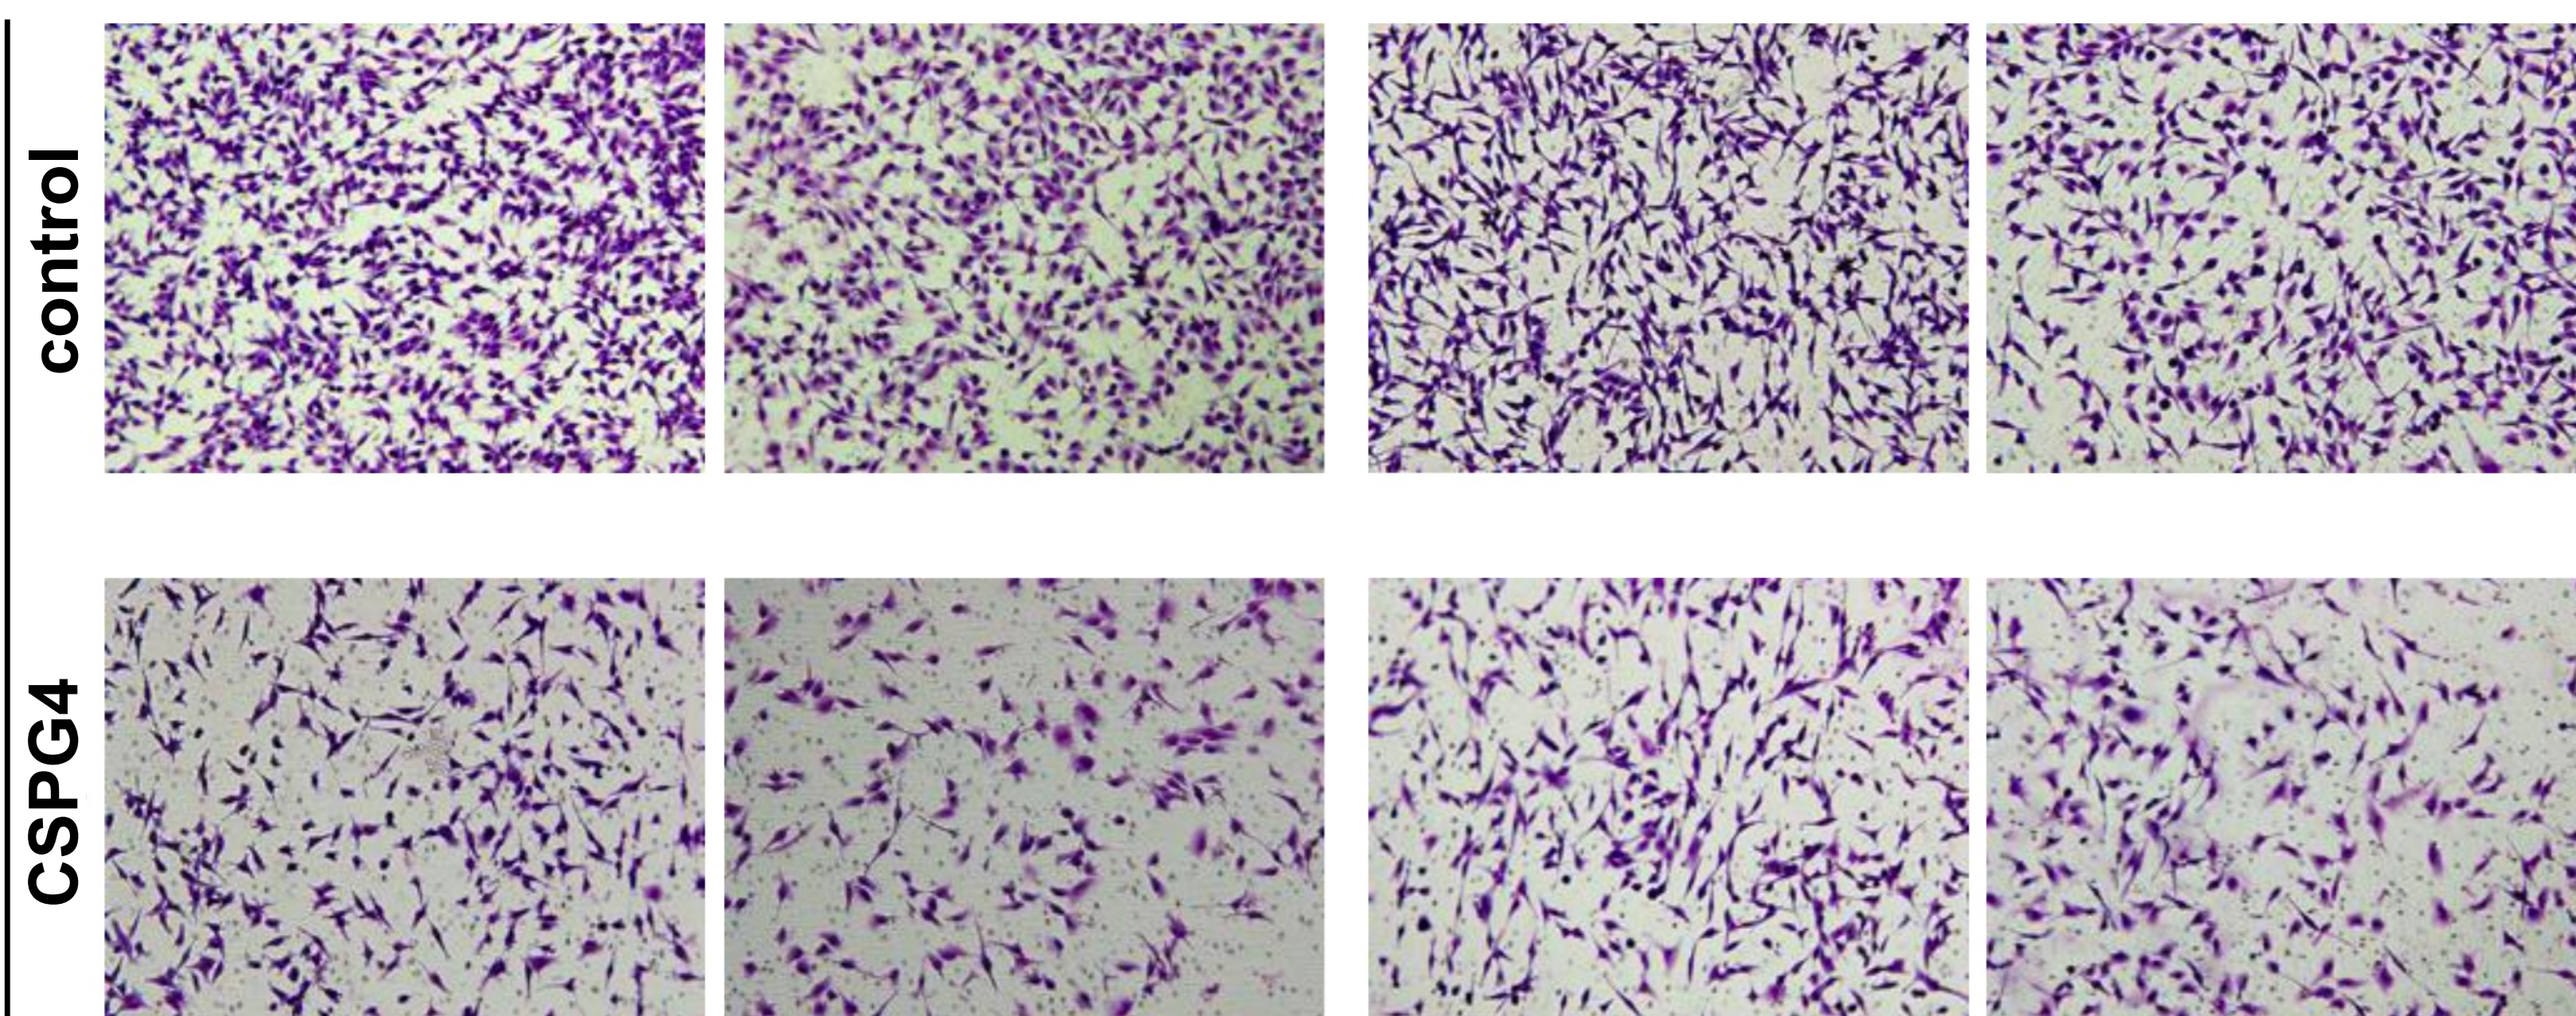**G**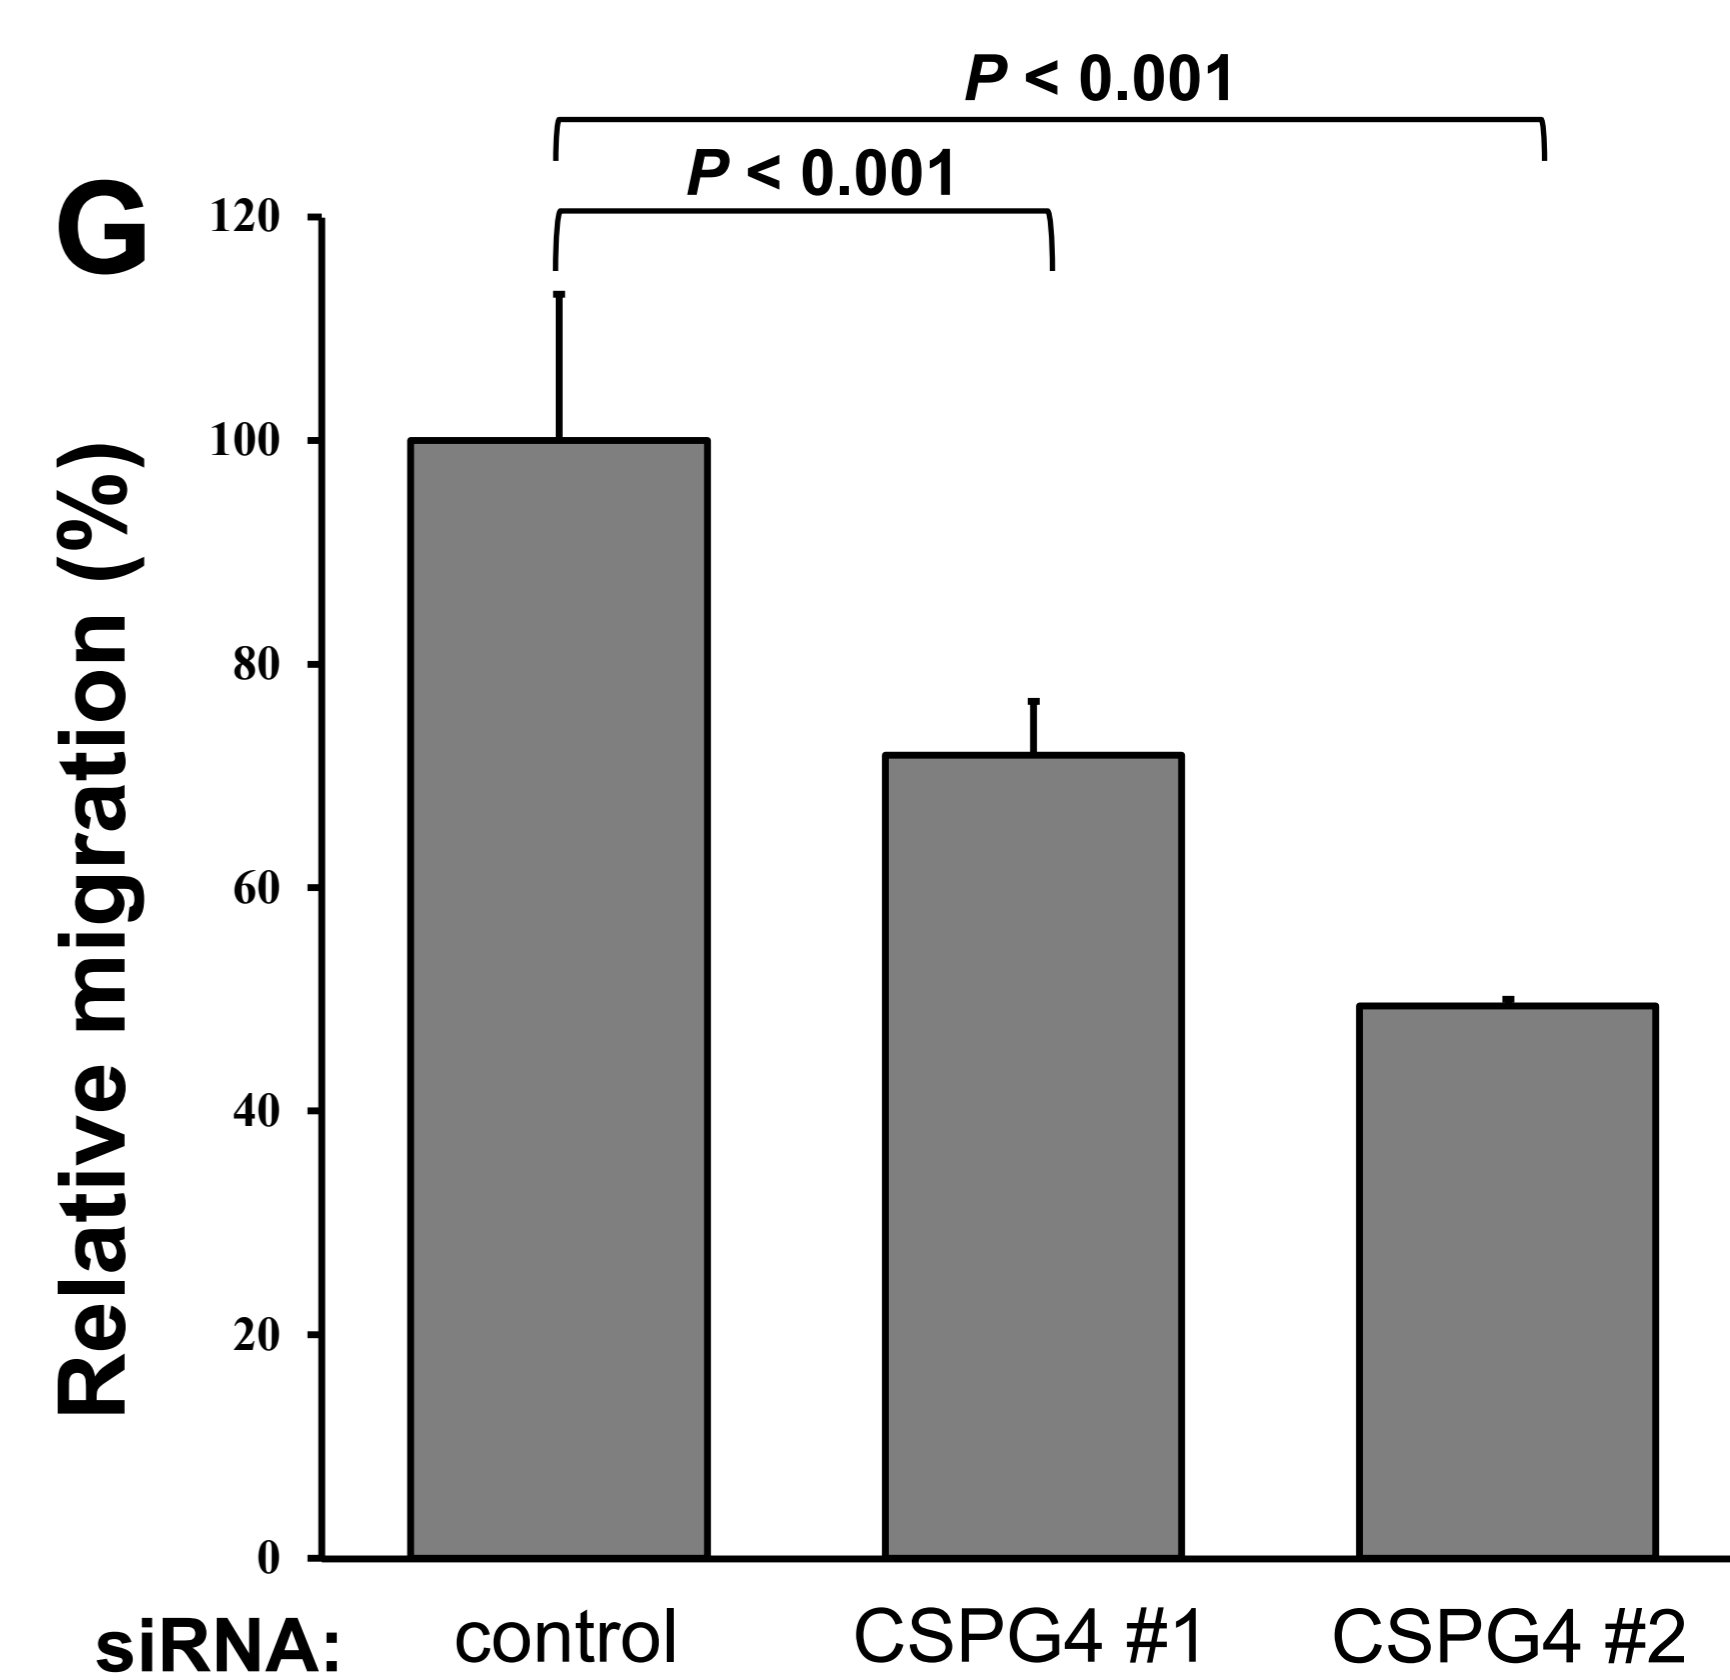**H**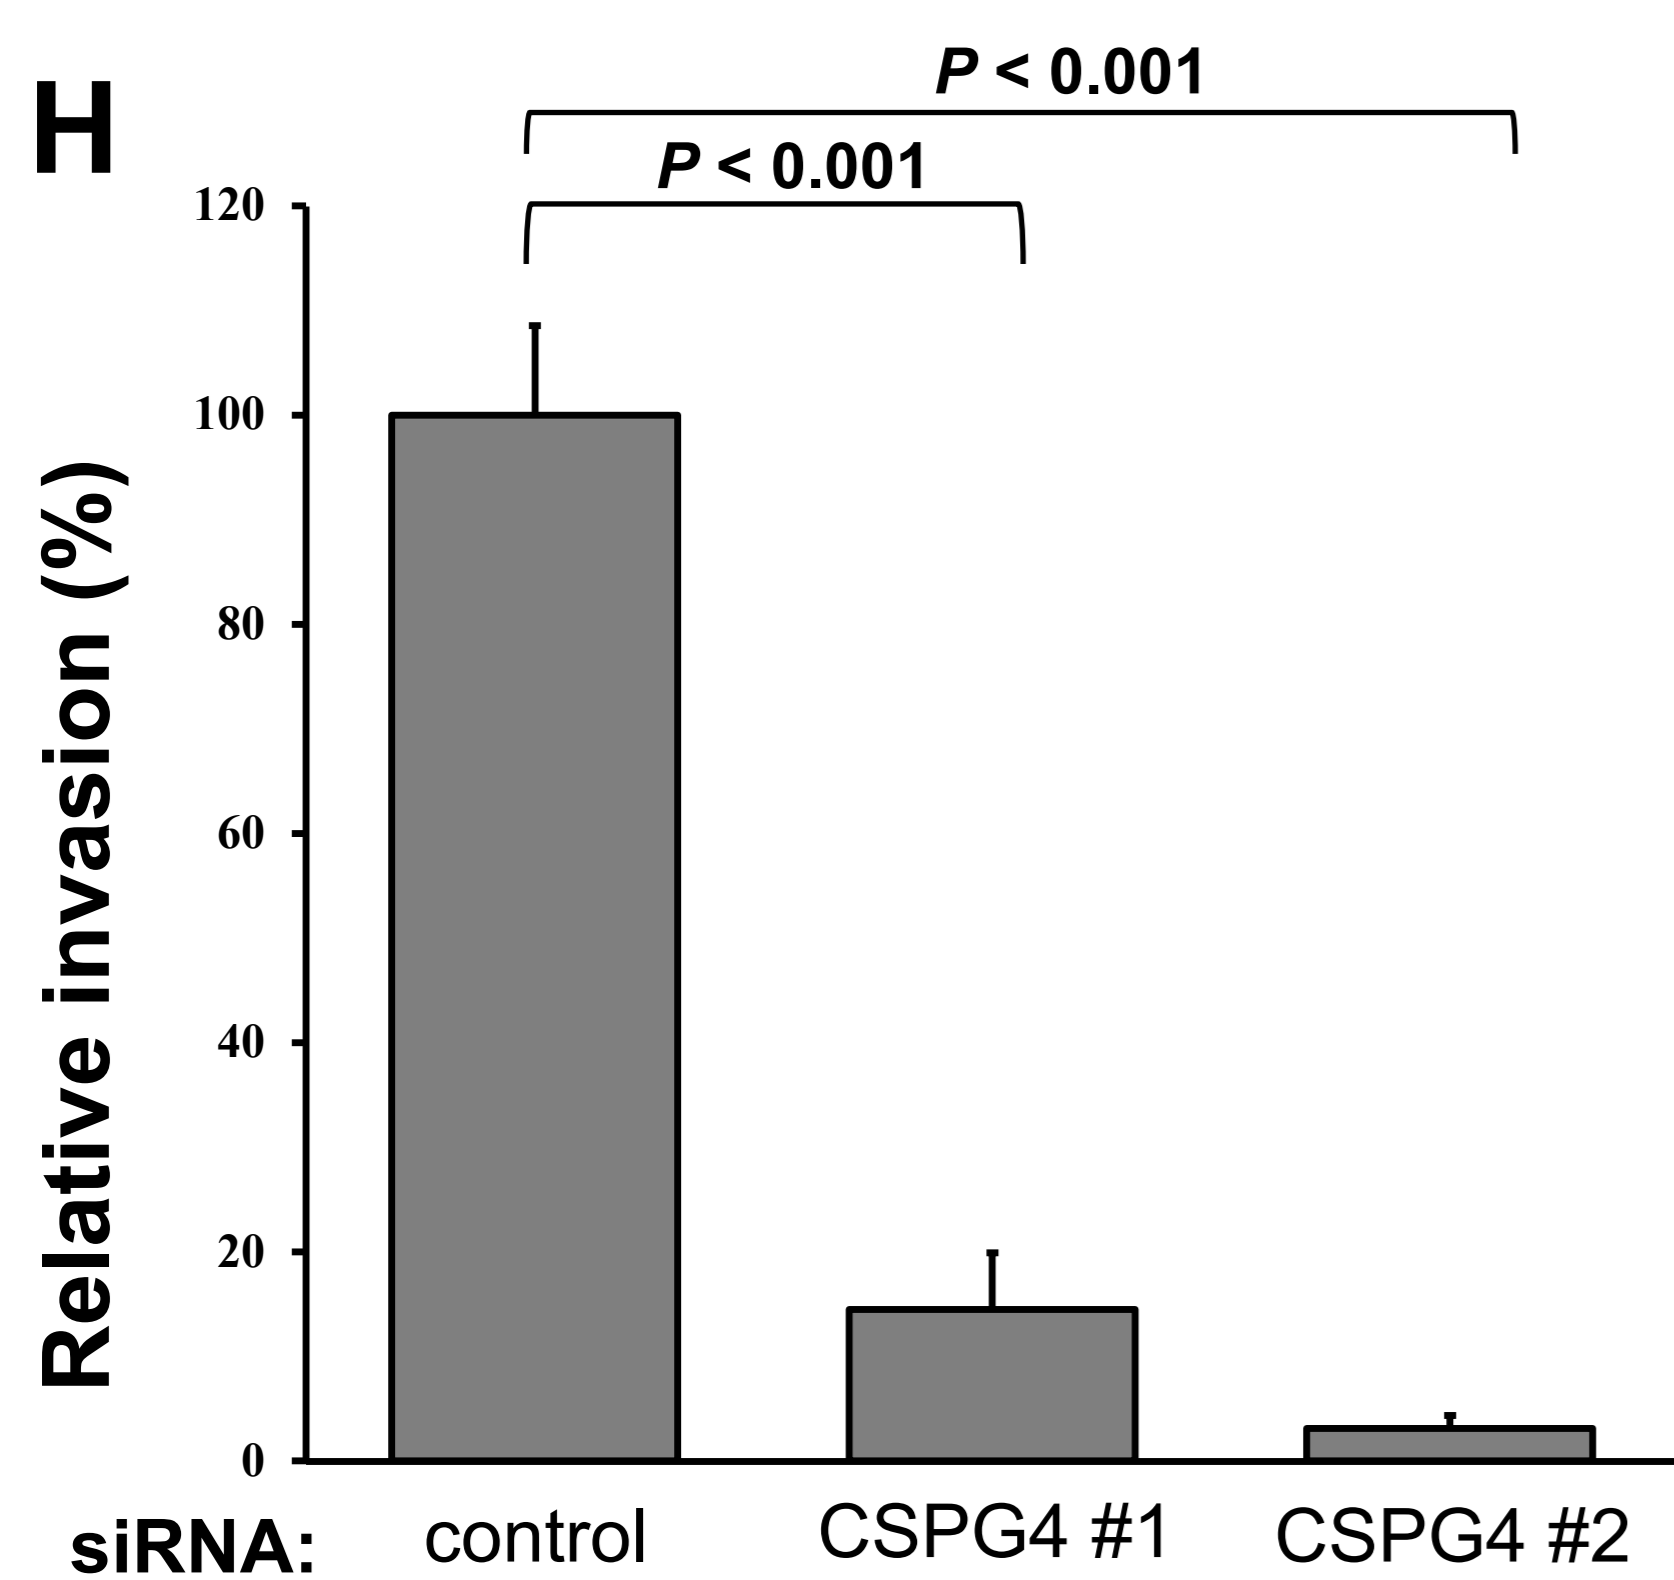**I****control****antiCSPG4**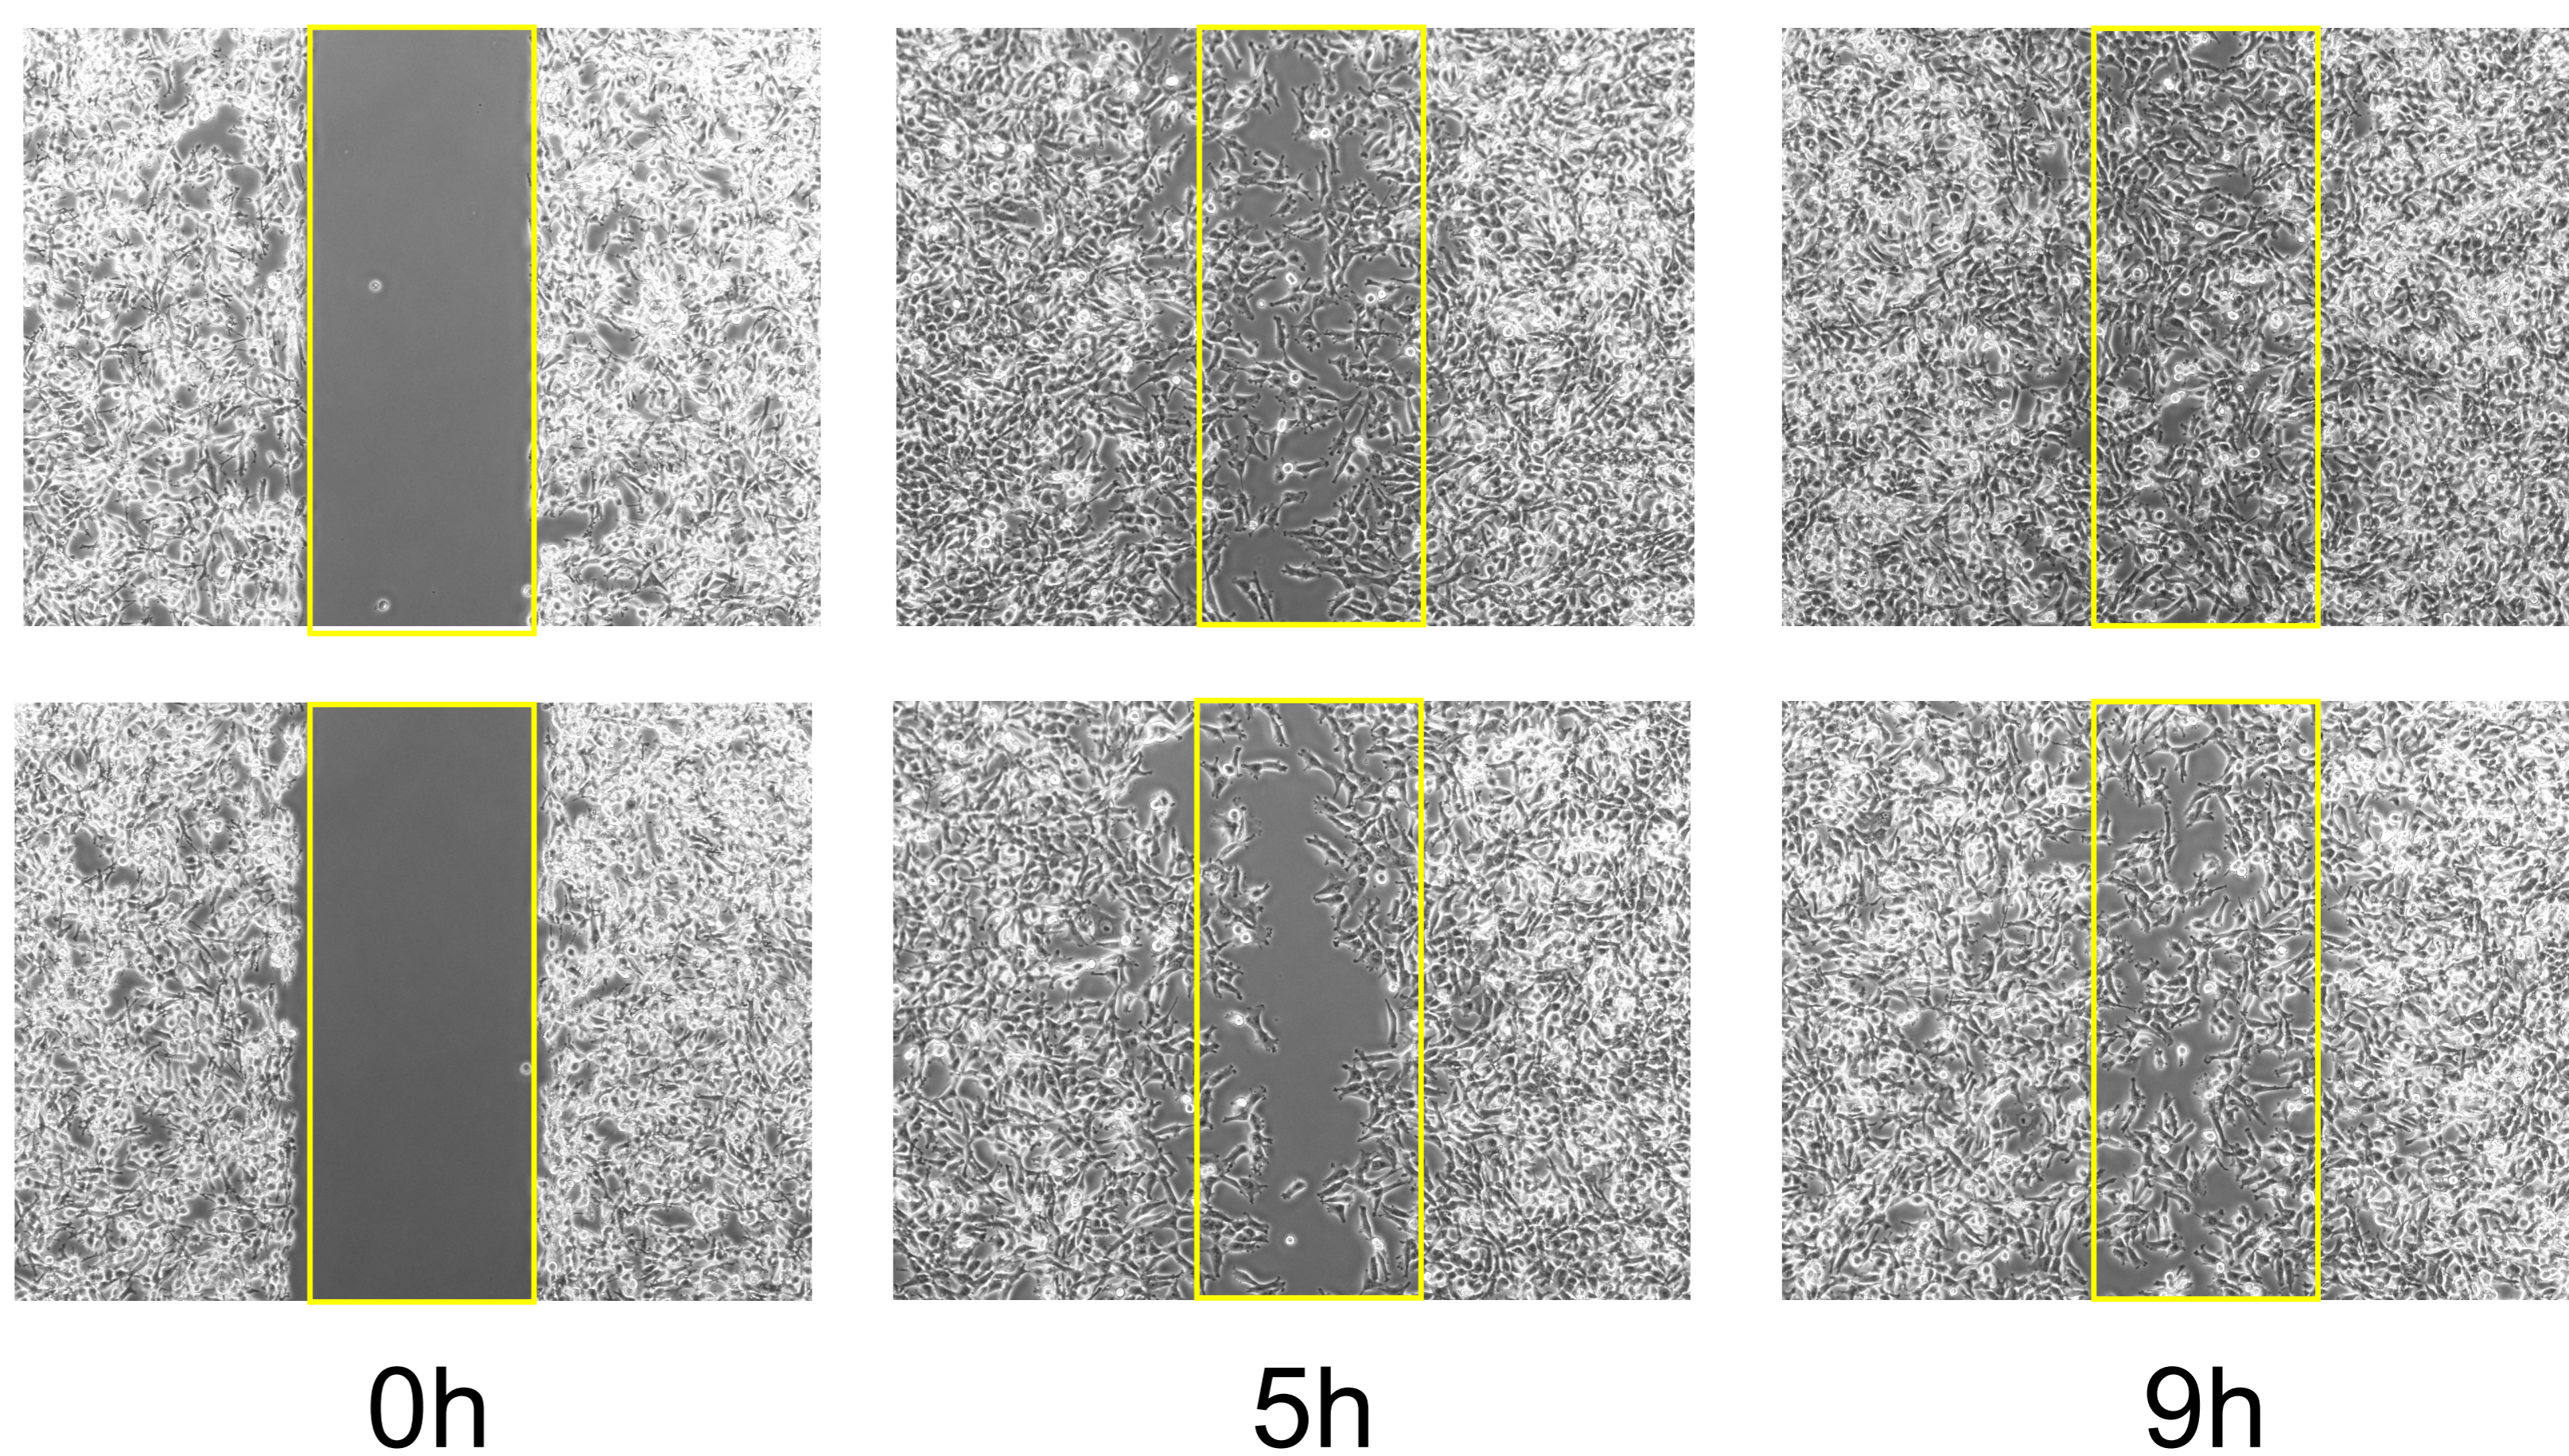

**Figure S1.** Downregulation of CSPG4 affects invasion, migration, and wound healing abilities in EOC cells

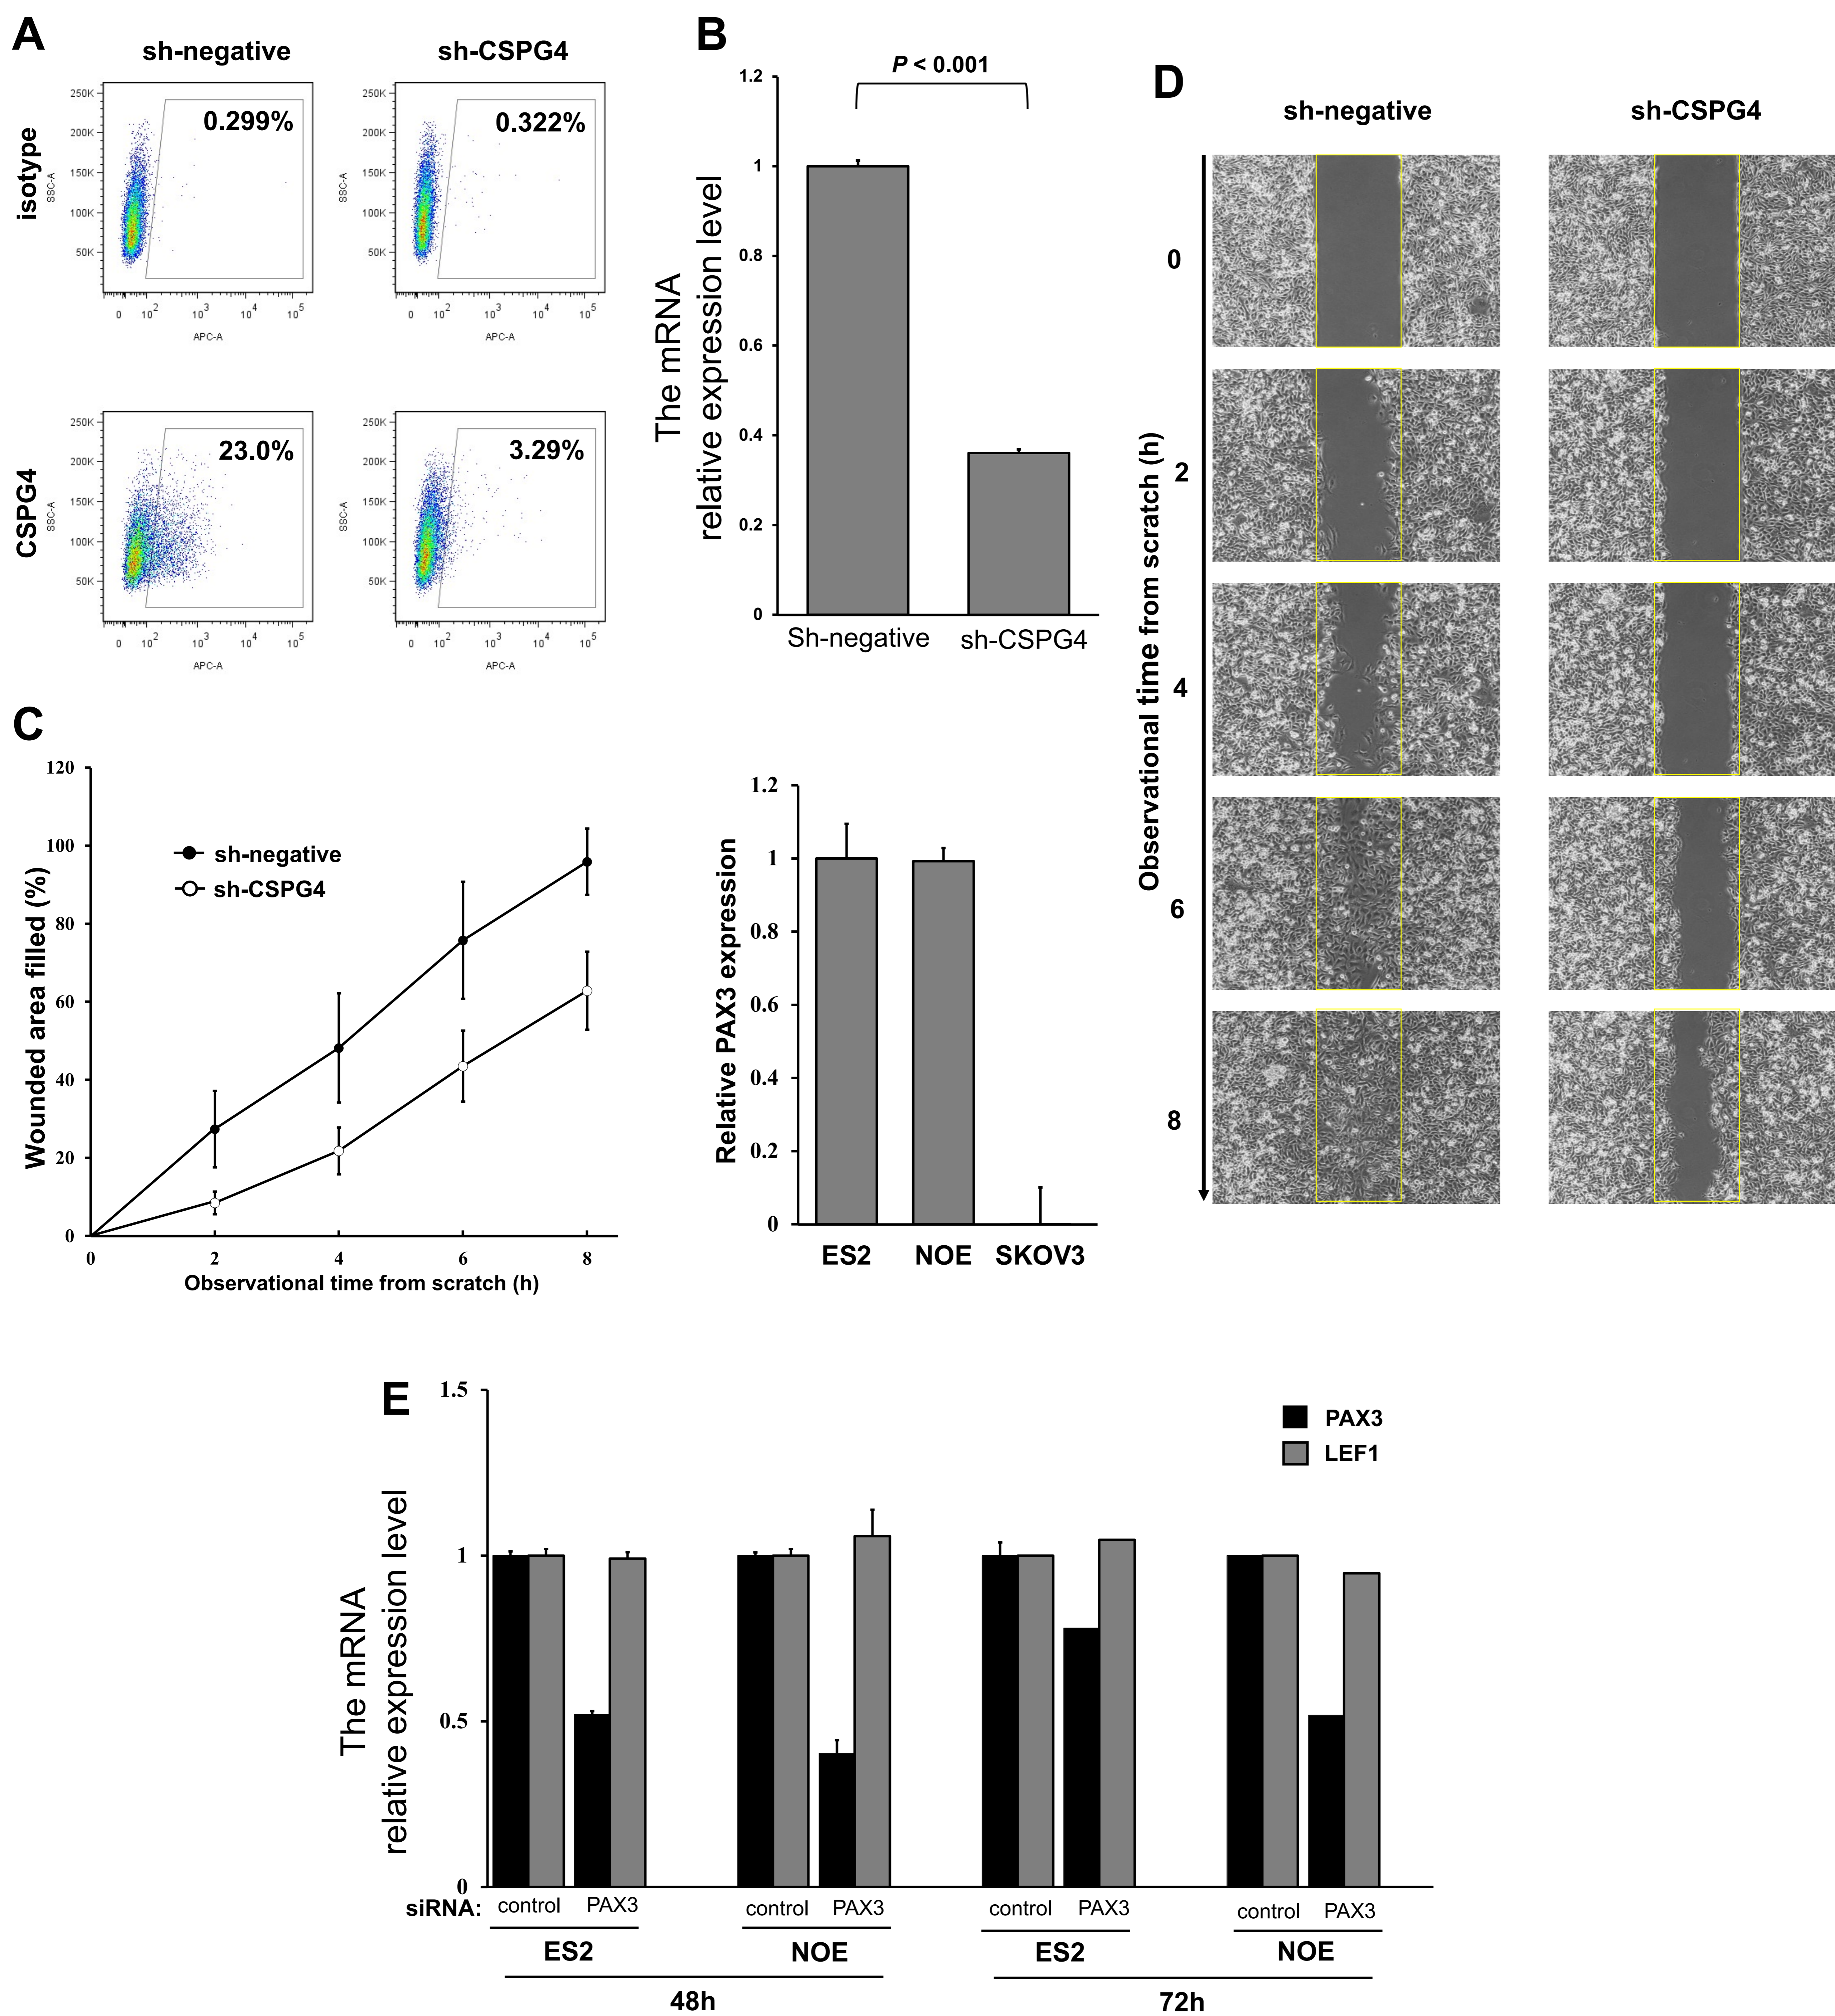

**Figure S2.** Decreased wound healing ability with sh-CSPG4.

**Table S1. Patient backgrounds**

| <b>Characteristics</b>                                  | <b>All patients (n = 52)</b> |
|---------------------------------------------------------|------------------------------|
| <b>Age in years, median <math>\pm</math> SD (range)</b> | 50 $\pm$ 9.2 (26–64)         |
| <b>FIGO tumor stage</b>                                 |                              |
| II, n (%)                                               | 5 (9.6%)                     |
| III, n (%)                                              | 47 (90.4%)                   |
| <b>Pathology</b>                                        |                              |
| Endometrioid carcinoma, G1, n (%)                       | 1 (1.9%)                     |
| Endometrioid carcinoma, G2, n (%)                       | 1 (1.9%)                     |
| Endometrioid carcinoma, G3, n (%)                       | 1 (1.9%)                     |
| High grade Serous carcinoma, n (%)                      | 39 (75.0%)                   |
| Mucinous rcinoma, n (%)                                 | 2 (3.8%)                     |
| Clear cell carcinoma, n (%)                             | 8 (15.4%)                    |
| <b>Neo-adjuvant chemotherapy, n (%)</b>                 | 8 (15.4%)                    |

SD, standard deviation; FIGO, International Federation of Gynecology and Obstetrics; G, grade.

**Table S2.**

| <b>Primers</b> | Target gene  | primer                | Primer sequence (5' to 3')                            |
|----------------|--------------|-----------------------|-------------------------------------------------------|
|                | <i>cspg4</i> | CSPG4-Fw<br>CSPG4-Rev | TGGCCTTCACTGTCACTGTCCTG<br>CAGAGCCTCCGCAGGGATGG       |
|                | <i>gapdh</i> | GAPDH-Fw<br>GAPDH-Rev | CATGTTTCGTCATGGGTGTGAACCA<br>AGTGATGGCATGGACTGTGGTCAT |
|                | <i>pax3</i>  | PAX3-Fw<br>PAX3-Rev   | GCTCCATACGTCCTGGTGCCAT<br>TCTTCTCCACGTCAGGCGTTGTC     |
|                | <i>lef1</i>  | LEF1-Fw<br>LEF1-Rev   | CCCCGATGACGGAAAGCATC<br>TGTTCTCGGGATGGGTGGAGAA        |
|                | <i>fn1</i>   | FN1-Fw<br>FN1-Rev     | TGTACCATCGCAAACCGCTGCC<br>TGGGCTTGCAGGTCCATTCTCCT     |

  

| <b>siRNAs</b> | Target gene  | siRNA    | Target sequence (5' to 3') |
|---------------|--------------|----------|----------------------------|
|               | non-targeted | control  | TTCTCCGAACGTGTCACGT        |
|               | <i>cspg4</i> | CSPG4 #1 | CCAGGTCAACCCTGTCAAT        |
|               |              | CSPG4 #2 | GCCGTTCTCTATAGCCACA        |
|               | <i>lef1</i>  | LEF1 #1  | GCGATTTAGCTGACATCAA        |
|               |              | LEF1 #2  | GCTACATATGCAGCTTTAT        |

  

| <b>shRNAs</b> | Target gene  | shRNA      | Target sequence (5' to 3') |
|---------------|--------------|------------|----------------------------|
|               | non-targeted | control    | TTCTCCGAACGTGTCACGT        |
|               | <i>cspg4</i> | CSPG4-7623 | TGGCTTTGACCCTGACTATGTTG    |
